# Supplementary material
Source: PubMed Central journal article supplement (PMC3837913)

**Supplemental Table 1**

**Individual Subject Population Sequencing at Day 1, Day 4, and Day 14 of the NS5A Coding Region**

**1 mg GS-5885**

| ID | GT | D1 Change From Reference 1a H77                                                                                               | D4 Change from D1                                                        | D14 Change from D1                                                                                                                                        |
|----|----|-------------------------------------------------------------------------------------------------------------------------------|--------------------------------------------------------------------------|-----------------------------------------------------------------------------------------------------------------------------------------------------------|
| AE | 1a | T64A I74V R78K K107T R123Q S131T T135A I144V E171D E181D M226V A245T                                                          | No Change From D1                                                        | No Change From D1                                                                                                                                         |
| AF | 1a | I52I/V K107K/R R123Q S131T I144V M226V N246N/T                                                                                | T87T/S N/T246T                                                           | T87T/S                                                                                                                                                    |
| AG | 1a | T64T/A R81K K107T R123Q S131T T135A I144V L158L/I E181D M226V A245I/T E264A I280V D292G V296I S306A/T R308K A310T R311P V326L | L31L/M H58H/P I/T245T R348Q L368V                                        | Q30Q/R L31L/M I/T245T A/T306S K308R T310A P311R L326V                                                                                                     |
| AH | 1a | G2D A25T R44K V46A R81K R123Q S131T K139R I144V L158I M226V V296I A310T R311P V315I                                           | I296V T310A P311R I315V                                                  | V326I R348Q L368V                                                                                                                                         |
| AI | 1a | A25T S85N K107A S131T I144V E171D/E S174T E181D G215K M226E A245T                                                             | No Change From D1                                                        | No Change From D1                                                                                                                                         |
| AJ | 1a | R78K R81K/R I121V R123Q S131T I144V R176I/M/R E181A M226V L239F                                                               | Unable To Genotype                                                       | R262K T270P/T E273D/E E275E/K I280I/V D285D/N E290E/K V296I E301E/K R308K/R A310A/S R311P V326I/M E327E/K K331E/K E335*/E R348K L368V N392D T395A/E V410A |
| AK | 1a | R44K S85N K107E/K I121V R123Q S131T I144V M226L K240K/R                                                                       | L226M K/R240K                                                            | Q30Q/R                                                                                                                                                    |
| AL | 1a | H58P E62D K68R V75T R78K R123Q S131T I144V L153V F161Y E171D M226E P237I K240R E256D                                          | V296I A310T R311P V326L T328S K357R E365D T370S E374Q T377A              | V296I A310T R311P V326L T328S K357R E365D T370S E374Q T377A                                                                                               |
| AM | 1a | M28V T71S T79S K107E I121V S131T I144V R176S E181A A197T L199V M226L N246D                                                    | Q30Q/R I280I/V V296I S306C/S R311Q V315I/V V326L T328P K331R D333G L368V | Q30H/Q/R                                                                                                                                                  |
| AN | 1a | S1A I34I/V R44K I52I/V R81K/R K107E S131T I144V E171D E181D A213T M226V A245A/I/T/V                                           | A25A/T E107E/K                                                           | No Change From D1                                                                                                                                         |

**3 mg GS-5885**

| ID | GT | D1 Change From Reference 1a H77                                                                                                                                                               | D4 Change from D1                                                                                                            | D14 Change from D1                                                                                                                                                    |
|----|----|-----------------------------------------------------------------------------------------------------------------------------------------------------------------------------------------------|------------------------------------------------------------------------------------------------------------------------------|-----------------------------------------------------------------------------------------------------------------------------------------------------------------------|
| A  | 1a | K107K/T R123Q S131T I144V M226V V296I R311Q V315I R348Q L368V I388V N392D T394A T395A C404H V410A G439E D441G                                                                                 | K24E/K Q107T I296V Q311R I315V Q348R V368L V388I D392N A394T A395T H404C A410V E439G G441D                                   | M28M/T Q30Q/R L31L/M V388I D392N A394T A395T H404C A410V E439G G441D                                                                                                  |
| B  | 1a | I12I/V R44K K107T R123Q S131T N137D/N I144V H180N E181A/T P183L/P A245V N246S I280I/V V296M R304L R308K R311P V315I V326I P346P/S R348Q S349P/S T367F/V L368I S369F/S P401S V410A G439E D441G | M28M/V Q30Q/R V37V/L Y93Y/C N137N/D P183P/L                                                                                  | I/V12I M28M/V V37L/V Y93C I121I/V D/N137N V181T S183L I/V280I M296V L304R K308R P311R I315V I326V P/S346P Q348R P/S349S F/V367T I368L F/S369S S401P A410V E439G G441D |
| C  | 1a | R44K R78K T99S K107T S131T T135A I144V R176S M226V V296I T328P L368V V410A G439E D441G                                                                                                        | W4*/W M28M/T Q30Q/R                                                                                                          | Q30Q/R I296V P328T V368L A410V E439G G441D                                                                                                                            |
| D  | 1a | R78K I121I/V R123Q S131T I144V E181D M226V                                                                                                                                                    | Q30Q/R I280V V296I A310T R311P/Q V326L T328K K331E P343P/S P347P/Q R348K/Q L368V G390S T394A/T V410A G439E/G A440A/D D441D/G | Q30H/Q/R L31L/M                                                                                                                                                       |
| E  | 1a | R78K/R K107T R123Q S131T I144V A213T G215K M226E A245A/T I280V V296I A310A/T R311P V315I/V V326L S349T L368V G390S T395A P401S V410A G439E A440T D441G                                        | Q30Q/R I/V315V                                                                                                               | Q30Q/R I/V315V                                                                                                                                                        |

|   |    |                                                                                                                                                                                                                |                                                                                                                  |                                                                                                                                                                              |
|---|----|----------------------------------------------------------------------------------------------------------------------------------------------------------------------------------------------------------------|------------------------------------------------------------------------------------------------------------------|------------------------------------------------------------------------------------------------------------------------------------------------------------------------------|
| F | 1a | R123Q F127S S131T N137D I144V S174N E181A M226L<br>K240R V296I P299C A310T R311Q S349P V361I L368V                                                                                                             | Q30Q/R E398G V410A T442A                                                                                         | M28M/T E398G V410A T442A                                                                                                                                                     |
| G | 1a | R123Q S131T I144V M226L/V A245T D251D/E E256E/Q<br>T270L V296I/V R308K R311Q/R V326M/V R348Q K357K/R<br>E365D/E T367N E374D/E T389A G390A N392D/N T393S<br>S396P A400A/S C404C/R P405S V410A D430E G439E D441G | L31L/M V37M/V S38F/S E/Q226L I/V251E I/V296V<br>Q/R311R M/V326V K/R357R D/E365E A373A/V<br>D/E374D D/N392N P400S | M28M/T Q30Q/R T204N/T L/V226L/M/V Q/R311R<br>M/V326V Q348R K/R357K D/E365E N367T D/E374E<br>A389T A390G D/N392N S393T P396S A/S400A<br>C/R404C S405P A410V E430D E439G G441D |
| H | 1a | R78K R123Q S131T I144V E171D M226V N246K E256Q<br>N276D V296I A310T R311Q V326I R348K L368I/L S369P<br>N392D T395A P405H V410A                                                                                 | K24K/N Q30H/Q/R D368I                                                                                            | Q30Q/R L31L/M D368I                                                                                                                                                          |
| I | 1a | L16V C98C/S K107T R123Q/R S131T I144V E181D A213T<br>G215K M226V I280V V296I R304L A310T R311P V315I/V<br>V326L R348Q E365D L368V G390S T395A S397P A400G<br>P401P/S V410D G439E A440T D441G                   | M28M/T I/V315V                                                                                                   | M28M/T L31L/M I/V315V                                                                                                                                                        |
| J | 1a | G2D/G H54H/Y R78K S85N/S I121V R123Q S131T T135A<br>I144V E181D G215A M226L/M A245T I280V K305R R308K<br>A310G R311P V315I V326L K331K/R S349P/S T367S L368V                                                   | D/G2G Q30H/Q R81K/R A92A/V R348Q/R G390S<br>D391D/G T394G T395A/T G403V V410A                                    | Q30Q/R L31L/M P/S349S                                                                                                                                                        |

#### 10 mg GS-5885

| ID | GT | D1 Change From Reference 1a H77                                                                                                                                                  | D4 Change from D1                                                                                              | D14 Change from D1                                                                                             |
|----|----|----------------------------------------------------------------------------------------------------------------------------------------------------------------------------------|----------------------------------------------------------------------------------------------------------------|----------------------------------------------------------------------------------------------------------------|
| K  | 1a | R78K K107T S131T I144V M226E K240R A245T I280V V296I<br>R311Q V326I R348K/Q L368V                                                                                                | R6G/R L31L/M Y93C/Y F127F/S E171D/E T328M/T                                                                    | Q30Q/R L31L/M R123Q/R I296V Q311R I326V<br>K/Q348R V368L                                                       |
| L  | 1a | R44K R78K S85T K107T E117D R123Q S131T I144V M226V<br>G267S V296I R311Q V326I                                                                                                    | M28M/T Q30Q/R L31L/M P343A R348Q L368V                                                                         | M28M/T Q30Q/R L31L/M I296V Q311R I326V                                                                         |
| M  | 1a | R44K K107T R123Q S131T I144V M226L V296I                                                                                                                                         | L31L/M I296V                                                                                                   | L31L/M I296V                                                                                                   |
| N  | 1a | V37M S85A/G/S/T K107N R123Q S131T I144V M226V                                                                                                                                    | Q30Q/R V296I R308K/R R311Q V315I/V V326I<br>R348Q T360M S369P T377A/T T389S V410A L428Y<br>G439E/G T442A/T     | Q30Q/R N85A V296I                                                                                              |
| O  | 1a | V46A T64A K107T R123Q S131T T135A I144V L158I E181D<br>M226L I280V V296I R311P V315I V326L R348Q E365D L368V<br>N392D/N P401S G403G/S D407D/N V410A G439E D441G                  | Q30H/Q/R V280I I296V P311R I315V L326V Q348R<br>D365E V368L D/N392N S401P G/S403G D/N407D<br>A410V E439G G441D | Q30H/Q/R V280I I296V P311R I315V L326V Q348R<br>D365E V368L D/N392N S401P G/S403G D/N407D<br>A410V E439G G441D |
| P  | 1a | R44K/R S85N K107T R123Q S131T I144V A213S M226E<br>E293E/G V296I A310T R311P V315I V326L R348Q L368V                                                                             | Q30Q/R K/R44R Y93C/Y                                                                                           | Q30Q/R K/R44R V368L                                                                                            |
| Q  | 1a | V37M/V T64S/T R78K/R R81K/R N105D/N R123Q S131T<br>I144V F161Y M226E                                                                                                             | M/V37V S/T64T M/V78K K/R81R S85N Y93C<br>D/N105N V296I R308K R311P V326L                                       | M/V37V S/T64T M/V78K K/R81R S85N Y93C<br>D/N105N                                                               |
| R  | 1a | S1C R44K/R R78K K107K/T F127S S131V T135A I144V<br>E171D S174T R176S E181D A213T M226E S228G G267S<br>S306F R308K R311P V315I V326L K331E/G/K/R R348Q L368V<br>N392D G403V Y413C | Unable To Genotype                                                                                             | No Data                                                                                                        |
| S  | 1a | G2D R44K K68R R81W K107T R123Q S131T I144V S146A/S<br>E171D                                                                                                                      | Unable To Genotype                                                                                             | Q30Q/R S249F I255V R262W A289T V296I                                                                           |

|   |    |                                                                                                                                       |                                                                                                 |                                                                                      |
|---|----|---------------------------------------------------------------------------------------------------------------------------------------|-------------------------------------------------------------------------------------------------|--------------------------------------------------------------------------------------|
| T | 1a | G2D R44K R78K K107T I121I/V R123Q S131T I144V M226E/V<br>A245T A252F/I/V E253D/E E256K G267G/S E291D V296I<br>R311Q V326L R348Q L368V | Q30Q/R H58D/H I/V121I D/E252F/V G/S256E/K<br>N276N/S K331K/N K357K/R P401S D407E V410A<br>D441S | Q30Q/R L31L/M F/I/V252A D/E253E K256E<br>G/S267G D291E I296V Q311R L326V Q348R V368L |
|---|----|---------------------------------------------------------------------------------------------------------------------------------------|-------------------------------------------------------------------------------------------------|--------------------------------------------------------------------------------------|

**10 mg GS-5885**

| ID | GT | D1 Change From Reference 1b Con 1                                                                                                                       | D4 Change from D1                                                                                         | D14 Change from D1                                                        |
|----|----|---------------------------------------------------------------------------------------------------------------------------------------------------------|-----------------------------------------------------------------------------------------------------------|---------------------------------------------------------------------------|
| AO | 1b | T17S/T F37L Q54H R78K T122R F127Y T135A L183V T245A<br>R246N E285D Q288R V296I R305K K308R R311S A347T<br>S364T T377V K378Q                             | Unable To Genotype                                                                                        | Y93H                                                                      |
| AP | 1b | F37L K44R Q54N P58P/S R78K V130I V138I C165S L176Q<br>K215G I280V Q288R A347T S364T                                                                     | P/S58P Y93H                                                                                               | H85H/Y Y93H                                                               |
| AQ | 1b | T99S K166G L176Q R246H Q288R R305K                                                                                                                      | Unable to Genotype                                                                                        | L31L/V Y93H/Y T99S K166G L176Q R246H Q288R<br>R305K S364T                 |
| AR | 1b | F37L Q54N R78K V138L E171D L176Q L183V T213A E285D<br>Q288R R305K R311S I315V L326I R359K                                                               | F36F/L Y93H/Y                                                                                             | L37F/L K78K/R Y93H L138I/L A213A/T S311A/S<br>A347A/T K359K/R             |
| AS | 1b | T14E T17S/T L31M F37F/I K44R L176Q T213S/T R246H/R<br>Q288R R305K A347T S364T E365D                                                                     | E14E/V S/T17T F/I37F S81C/S Y93H S/T213S<br>H/R246R R311P/R I315I/V A349A/T I352I/V                       | E14E/V S/T17T F/I37F S81C Y93H S/T213S H/R246R<br>R311P I315V A349T I352V |
| AT | 1b | R30Q Q62K P77S R78K T174V L176Q E285D Q288H R305K<br>A347T I352V R359K S364T                                                                            | Y93H                                                                                                      | Y93H                                                                      |
| AU | 1b | K44R V138I/V A164A/V L176Q A197A/T Q288R R305K I315V<br>A347T S364T                                                                                     | H85H/Y Y93H                                                                                               | H85H/Y Y93H                                                               |
| AV | 1b | F37I Q54H R78K E116A V138I L176Q A197T A219D T245A<br>R246H E285D Q288R R305K K308S R311L M313L I315V<br>L326I V335T A347T V362I S364T                  | Unable to Genotype                                                                                        | K78K/R Y93H                                                               |
| AW | 1b | F37V K44R R78K S101C E171D L176Q T213S I280V Q288R<br>R305K I315V A347I A349T V362I S364T E365D                                                         | Unable to Genotype                                                                                        | Y93H V315I/V                                                              |
| AX | 1b | T17S/T K20K/R Q54H T56I Q62E/Q T79A V130I/M/V E171D/E<br>L176Q A197A/T E285D/E Q288R R305K R311P/R M313L/M<br>I315I/V L326I/L P346S A347D/N R357K S364T | S/T17S K/R20R E/Q62E Y93H I/M/V130I D/E171D<br>A/T197A D/E285D P/R311P L/M313L I/V315V<br>I/L326I D/N347S | I56I/T Y93H D/E285D P/R311P I/L326I S346P/S<br>D/N347N/T                  |

30 mg GS-5885

| ID | GT | D1 Change From Reference 1a H77                                                                                                      | D4 Change from D1                                                                              | D14 Change from D1                                                                                                                                                                   |
|----|----|--------------------------------------------------------------------------------------------------------------------------------------|------------------------------------------------------------------------------------------------|--------------------------------------------------------------------------------------------------------------------------------------------------------------------------------------|
| U  | 1a | R44K S85N T99S R123Q S131T I144V S174T V296I R311P                                                                                   | Q30Q/R L31L/M R348Q S369P                                                                      | Q30Q/R L31L/M                                                                                                                                                                        |
| V  | 1a | F36L V37M/V K107T R123Q S131T I144V A197T L199V M226L K240R V296I                                                                    | Q30Q/R S306H R307P A310T V315I T328A R348K L368V                                               | Q30Q/R                                                                                                                                                                               |
| W  | 1a | S3C/S F36F/L V37I/M/V R44K H58H/P E62D/E K107S I121I/V R123Q S131T M133M/V I144V E152E/V L158I/L F161F/Y E171D/E S174S/T E181A/E/K/T | L31M F/L36L I/M/V37V H/P58P D/E62D I/V121V E/V152V I/L158I F/Y161Y D/E171D S/T174S A/E/K/T181E | C/S3C L31M F/L36L I/M/V37V H/P58P D/E62D I/V121V M/V133V E/V152V I/L158I F/Y161Y D/E171D S/T174S R176S A/E/K/T181T G215R M226E P237L A245I V296I A310T R311P V315I V326I R348Q L368V |
| X  | 1a | K24K/R R44K/R R48Q/R V75A/V K107M/T I121I/V R123Q/R S131T T135A/T I144V M226I/M/V A245T E253D                                        | K/R24R L31L/M K/R44K Q/R48R M/T107T I/V121I Q/R123Q A/T135T I/M/V226M T245A D253E              | Q30Q/R L31L/M M/T107T I/V121I I/M/V226M T245A D253E                                                                                                                                  |
| Y  | 1a | R78K K107T R123Q S131T T135A I144V E171D E181D G215K M226L A245T                                                                     | Q30Q/R L31L/M Y93C/Y                                                                           | Q30Q/R Y93C/Y                                                                                                                                                                        |
| Z  | 1a | R78K K107T R123Q S131T M133V I144V R176T M226L A245T E256Q I280V V296I                                                               | Unable To Genotype                                                                             | Q30Q/R H58D/H I296V                                                                                                                                                                  |
| AA | 1a | R78K S85N S131T N137D I144V E181A M226V D248E                                                                                        | Q30E/G/Q/R L31L/M                                                                              | L31M D137N V144I A181E V226M E248D                                                                                                                                                   |
| AB | 1a | R78K I121V R123Q S131T K139R I144V L158I G215R M226V G267S                                                                           | Y93H/Y V296I R311Q V326L W329*/W R348Q T377V                                                   | Q30Q/R Y93C/Y V296I R311Q V326L R348Q T377V                                                                                                                                          |
| AC | 1a | Q30E/Q R123Q S131T I144V E171D G215K M226V                                                                                           | E/Q30E N246D D248N                                                                             | E/Q30E N246D D248N I280V V296I R308K A310T R311P V326L R348Q T367S L368V                                                                                                             |
| AD | 1a | Unable to Genotype                                                                                                                   | Unable to Genotype                                                                             | Unable to Genotype                                                                                                                                                                   |

90 mg GS-5885

| ID | GT | D1 Change From Reference 1a H77                                                                                       | D4 Change from D1                                            | D14 Change from D1                            |
|----|----|-----------------------------------------------------------------------------------------------------------------------|--------------------------------------------------------------|-----------------------------------------------|
| BI | 1a | V75A/V S85N/S K107T R123Q S131T I144V I209V G215R M226E A245T V296I/V R308K/R A310T R311Q V315I/V V326I/L R348Q L368V | K24K/R Q30Q/R T64A/T                                         | Q30Q/R H58D/H T64A/T                          |
| BJ | 1a | I12V V75A R123Q S131T I144V E181A A213A/T M226V V296I R311P                                                           | Q30Q/R Y93C/Y V326L T328S T364S L368V T370A                  | Q30Q/R L31L/M A181E A/T213A V226M I296V P311R |
| BK | 1a | M83T C98S K107T R123Q S131T I144V E181D G215K V288A V296I R311Q V326I                                                 | Q30K/Q/R Y93C/H/R/Y V288A/V K331E R348Q L368V                | Q30R K331E R348Q L368V                        |
| BL | 1a | R44K R78K R81K K107T I121V R123Q S131T T135A/T I144V E171D L199V G215R M226E A245T E256A                              | Q30Q/R Y93C/Y A/T135A I280V V296I S306A R311P V315I V326L    | Q30Q/R L31L/M T135A E256A                     |
| BM | 1a | L31M R78K/R R81K R123Q S131T I144V A213A/T M226V A245A/T                                                              | No Change From D1                                            | No Change From D1                             |
| BN | 1a | R81K S85D R122K/R R123Q S131T I144V S174T A197T L199V G215R M226E A245T                                               | Unable to sequence                                           | Q30Q/R                                        |
| BO | 1a | R44K I52I/V T71S K107T S131T I144V L153L/V M226V I280V V296I S306Y R311P V315I/V V326L                                | L31M I/V52I L/V153L I/V315V L368V                            | L31M I/V52I L/V153L I/V315V L368V             |
| BP | 1a | R78K/R K107T R123Q S131T I144V G215K M226E A245T                                                                      | L31L/M K/R78R Y93H/Y V296I R311Q V326I L368V                 | L31L/M                                        |
| BQ | 1a | V75A/V R81K/R K107T R123Q S131T T135A I144V M226V V296I R311T V326I/L/M R348Q K358K/R                                 | Q30Q/R K358R                                                 | Q30Q/R S85N/S Y93C/Y K358R S369P/S            |
| BR | 1a | I52V T64A R78K R123Q S131T M133I T135A I144V L158I H180N G215A M226V A245T                                            | Q30Q/R I280V V296I A310T R311P V326L D333G R348Q E365D L368V | Q30Q/R Y93C/Y                                 |

Placebo

| ID  | GT | D1 Change From Reference 1a H77* or 1b Con 1^                                                                                                                            | D4 Change from D1           | D14 Change from D1                                                                  |
|-----|----|--------------------------------------------------------------------------------------------------------------------------------------------------------------------------|-----------------------------|-------------------------------------------------------------------------------------|
| AY* | 1a | K107T S131T N137D I144V E181A A245A/V                                                                                                                                    | No Change From D1           | No Change From D1                                                                   |
| AZ* | 1a | L31L/M R44K/R R78K S85N A103A/S I121I/V R123Q S131T I144V L153L/V E181D A245T                                                                                            | No Change From D1           | A/S103A L/V153L T245A                                                               |
| BA* | 1a | R44K A92P K107T R123Q S131T I144V H180N A213S M226L A245T                                                                                                                | V296I R311Q V315I/V         | V296I                                                                               |
| BB* | 1a | S1A R44K K107T R123Q S131T I144V E181D G215R A219E M226V A245V E264A I280V V296I R308K A310T R311Q V315I/V T367S L368V S384S/T G390S T395A S397P P401S S402P V410A G439E | Q30H/Q/R                    | Q30Q/R L31L/M I/V315V S367T V368L S/T384S S390G A395T P397S S401P P402S A410V E439G |
| BC* | 1a | R44K G49E I52V K107T R123Q/R S131T I144V L158L/V F161Y A197T L199V G215G/R D251D/N                                                                                       | No Change From D1           | D/N251D                                                                             |
| BD* | 1a | T64S/T R78K R123Q S131T I144V L158I M226V V296I                                                                                                                          | L31L/M                      | No Change From D1                                                                   |
| BE* | 1a | S85N T99N S114A R123Q S131T N137D I144V E181A A213T M226V A252V I255L D285E V296I                                                                                        | A289A/G E293E/K R308K/R     | E285D I296V                                                                         |
| BF* | 1a | I8I/V R44K R78K R123Q S131T I144V E171D M226E/V D248E                                                                                                                    | D171D/E R311P V326L K331E/K | D171D/E A310A/T R311P V326L K331E/K D333D/G T360M/T L368V                           |
| BG^ | 1b | G2D T17S K44R T79A E171D L176Q R246H E285D Q288R R305K R311A I315V A349T S364T                                                                                           | No Change From D1           | No Change From D1                                                                   |

|     |    |                                                                                                                         |                   |                   |
|-----|----|-------------------------------------------------------------------------------------------------------------------------|-------------------|-------------------|
| BH^ | 1b | T17S L31M F37L Q54H R78K V138I E171D L176Q L179C<br>E285D Q288R R305K S306T R311P L326I D331D/N A347T                   | No Change From D1 | No Change From D1 |
| BS* | 1a | V37L R78K K107T I121I/V R123Q S131T I144V E181D M226V<br>I280V V296I S306Q A310T R311Q V326L T328P K331Q<br>E335K L368V | No Change From D1 | No Change From D1 |
| BT* | 1a | R44K R78K K107T R123Q S131V T135A I144V E181D A213T<br>M226V A245T                                                      | No Change From D1 | E290G             |

Supplemental Figure 1

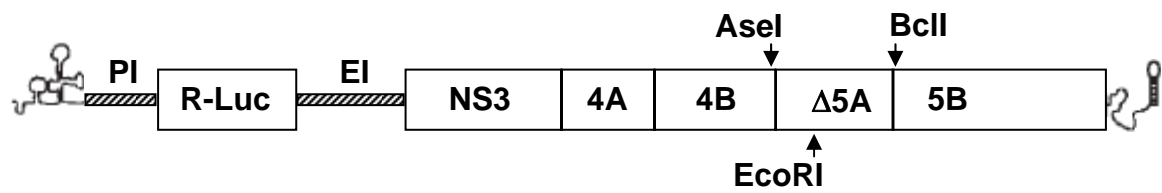

NS5A shuttle vector used for genotype 1a and genotype 1b NS5A insertion from clinical isolates. The backbone of the shuttle vector is from 1b: Con-1 AJ238799. The IRES elements driving Renilla Luciferase (R-Luc) and non-structural protein transcription respectively are the polio virus IRES and encephalomyocarditis virus IRES.

Lohmann V, Korner F, Koch J, Herian U, Theilmann L, Bartenschlager R. 1999. Replication of subgenomic hepatitis C virus RNAs in a hepatoma cell line. *Science* **285**:110-113.

## Supplemental Figure 2

Genotype 1a Patients dosed with 1 mg GS-5885

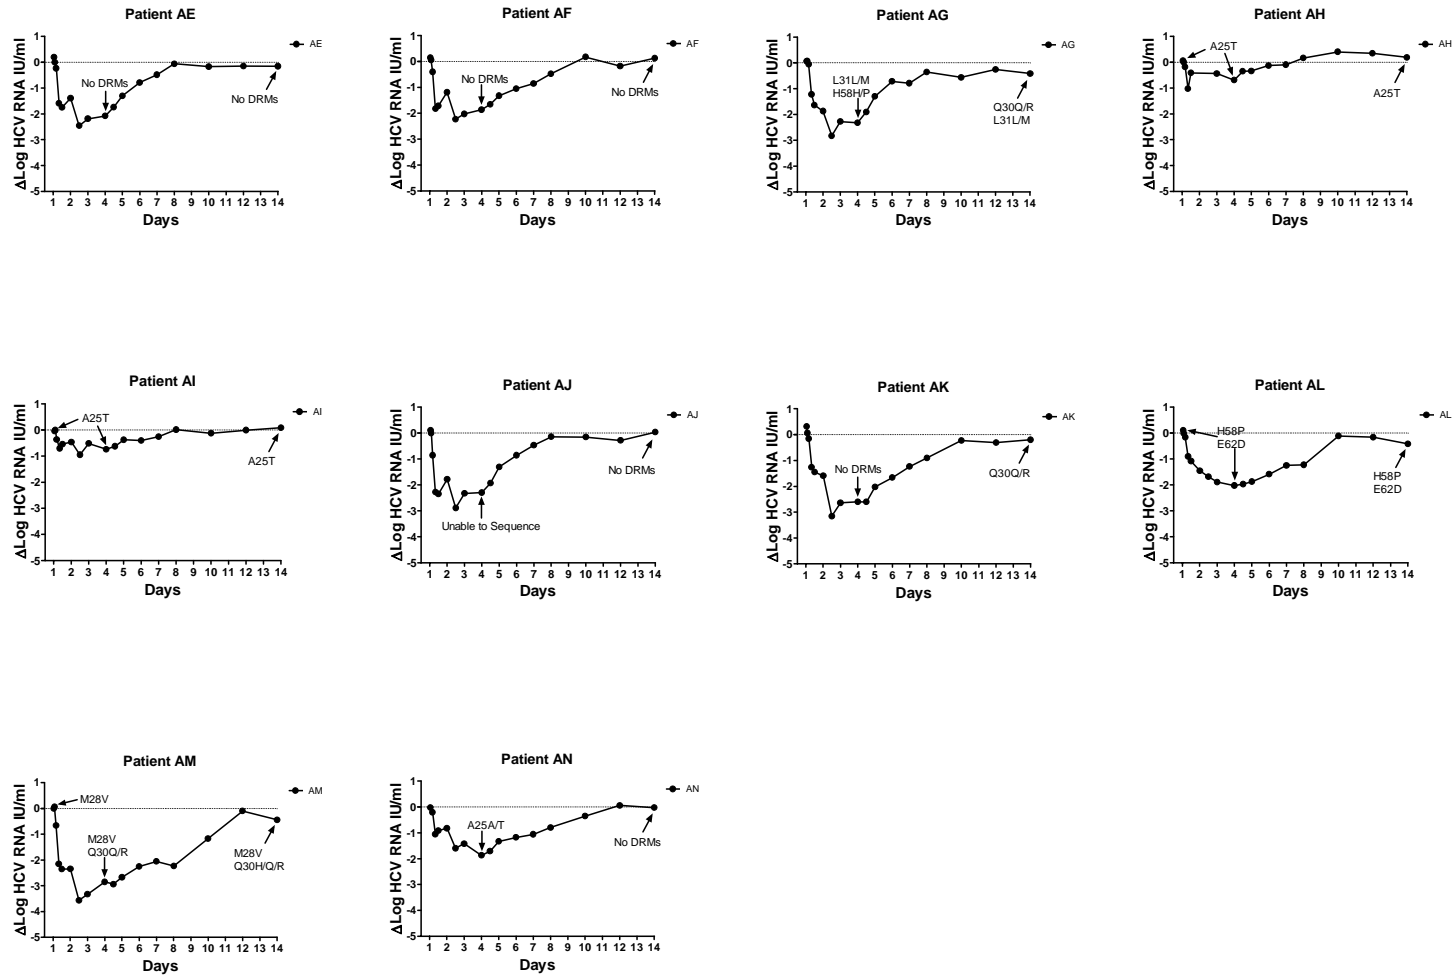



Genotype 1a Patients dosed with 3 mg GS-5885

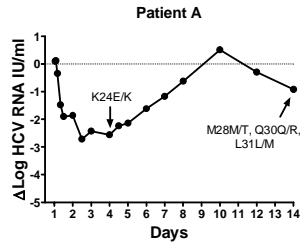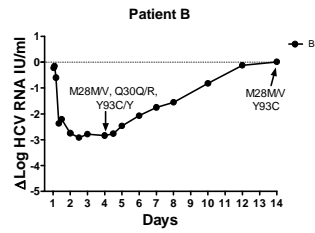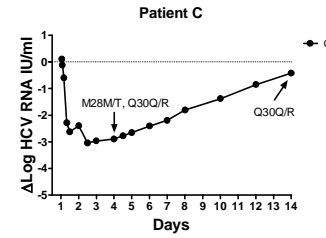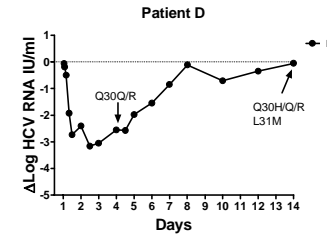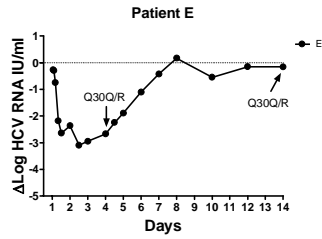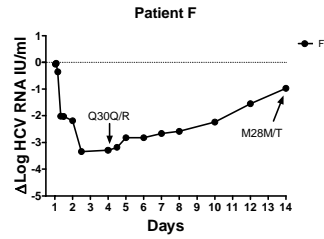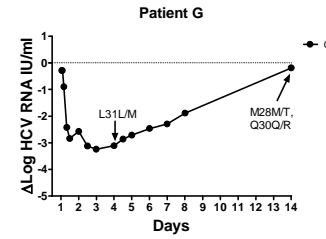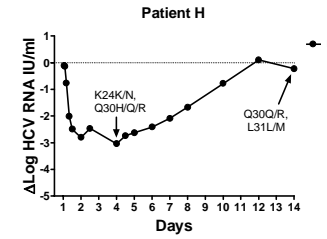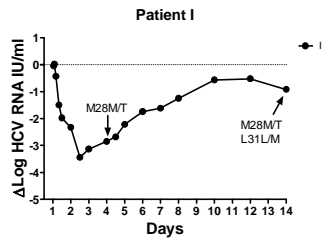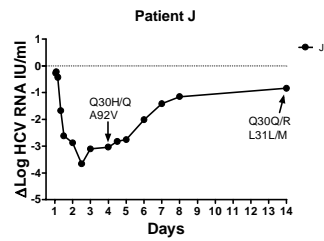

Genotype 1a Patients dosed with 10 mg GS-5885

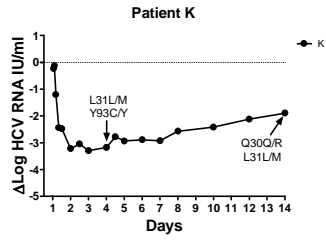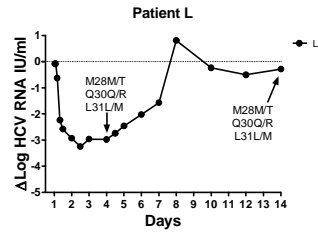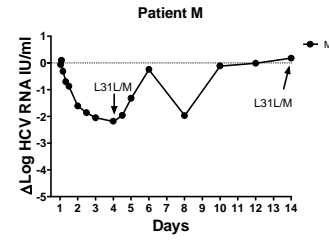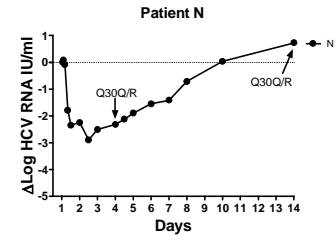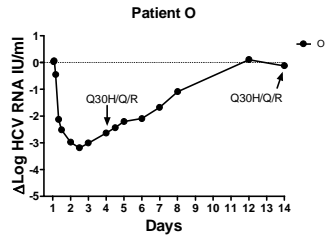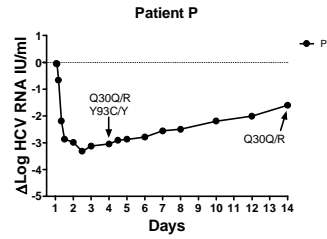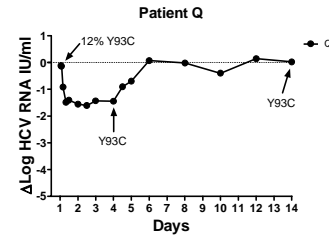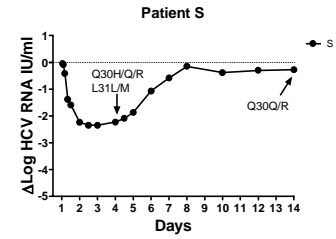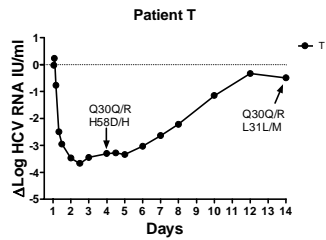

Genotype 1b Patients dosed with 10 mg GS-5885

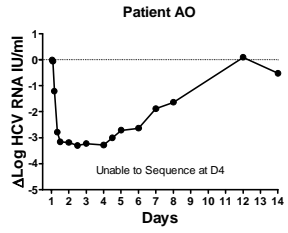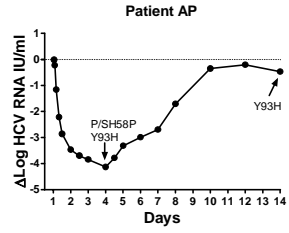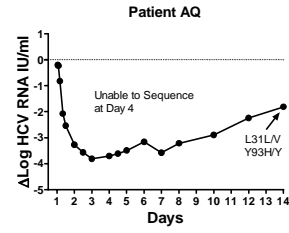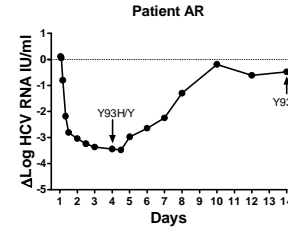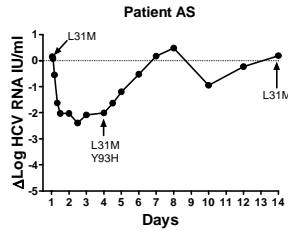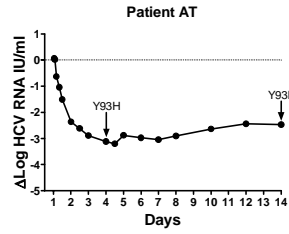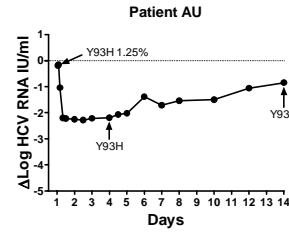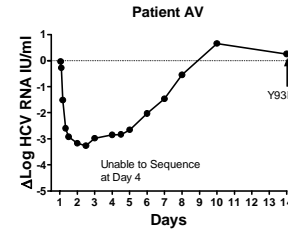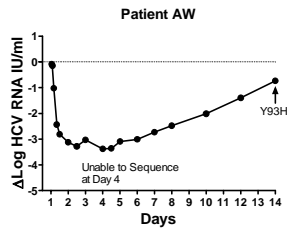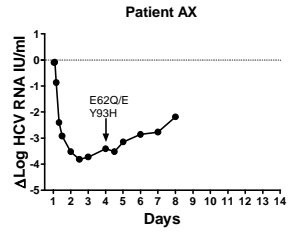

Genotype 1a Patients dosed with 30 mg GS-5885

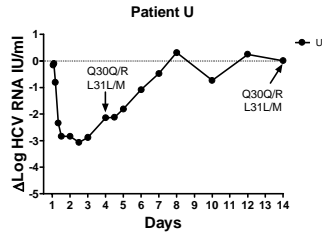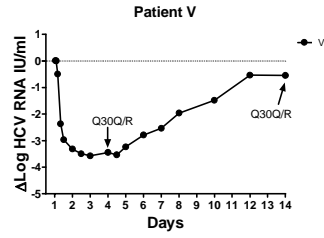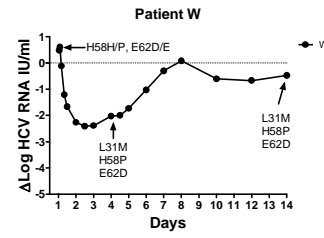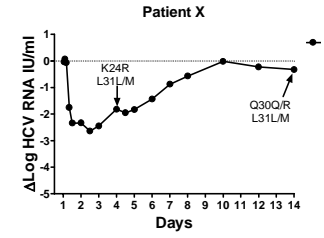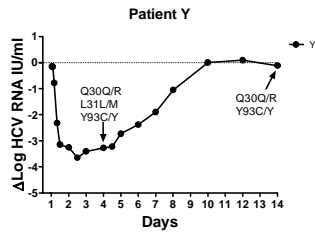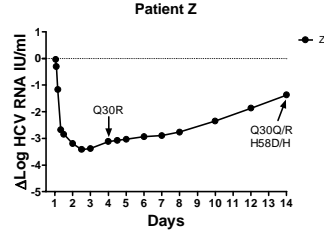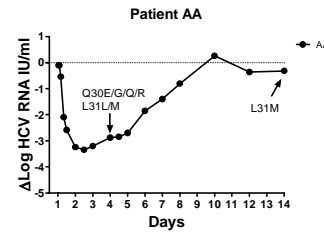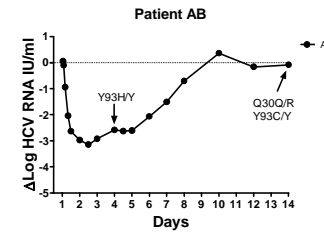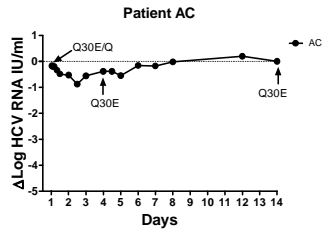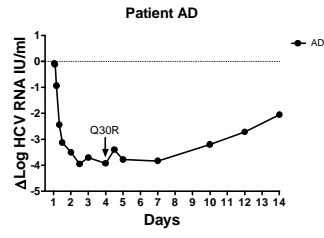

Genotype 1a Patients dosed with 90 mg GS-5885

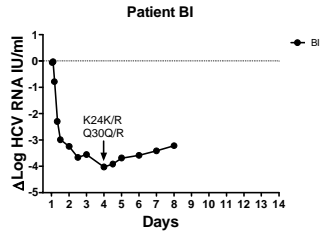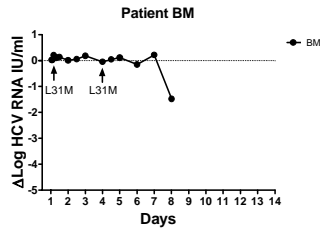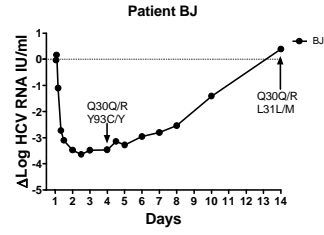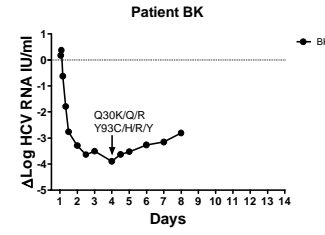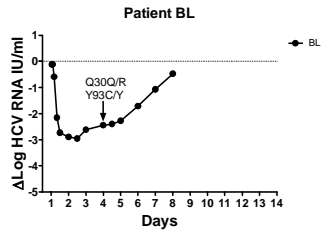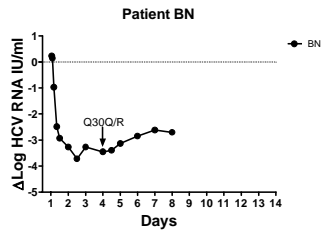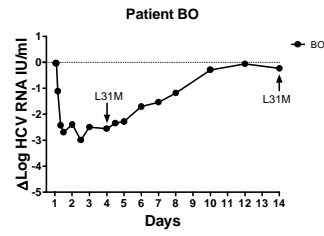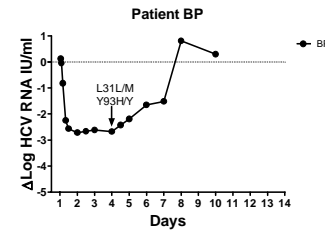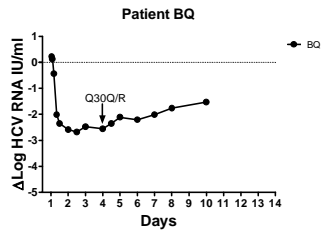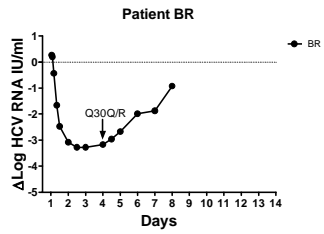

Supplement: AAC.02193-12_zac010132201so1.pdf [file AAC.02193-12_zac010132201so1.pdf]
